# Supplementary material for: CD163 as a Biomarker in Colorectal Cancer: The Expression on Circulating Monocytes and Tumor-Associated Macrophages, and the Soluble Form in the Blood
Source: PubMed Central journal article supplement (PMC7460610; doi:10.3390/ijms21165925), 2020-08-18
Supplement: ijms-21-05925-s001.pdf [file ijms-21-05925-s001.pdf]

**Table S1:** Association of monocyte percentages, sCD163 levels and TAM subsets with clinicopathological characteristics of CRC patients. **A.** sCD163 levels in serum. **B.** Subset distribution of circulating monocytes. **C.** Expression of CD163 on circulating monocyte subsets. **D.** Density of sTAMs in primary colorectal tumors. **E.** Subset distribution of sTAMs in primary colorectal tumors. **F.** Density of ieTAMs in primary colorectal tumors. **G.** Subset distribution of ieTAMs in primary colorectal tumors. Statistically significant *P*-values ( $\leq 0.05$ ) are indicated in bold. Abbreviations: CRC (colorectal cancer), ieTAM (intraepithelial TAM), MFI (median fluorescence intensity), sCD163 (soluble CD163), SD (standard deviation), sTAM (stromal TAM), TAMs (tumor-associated macrophages), TNM (Tumor, Node, Metastasis).

| <b>A.</b>                   | <b>sCD163</b> |             |           | <b>P-value</b> |
|-----------------------------|---------------|-------------|-----------|----------------|
|                             | <b>No.</b>    | <b>Mean</b> | <b>SD</b> |                |
| <b>Parameters</b>           |               |             |           |                |
| TNM stage (Spearman)        |               |             |           | 0.141          |
| TNM stage (ANOVA)           |               |             |           | 0.215          |
| <i>Stage 0/I</i>            | 15            | 1.9         | 0.7       |                |
| <i>Stage II/III</i>         | 43            | 2.4         | 1.1       |                |
| <i>Stage IV</i>             | 6             | 2.7         | 1.1       |                |
| Tumor location              |               |             |           | 0.626          |
| <i>Colon</i>                | 52            | 2.3         | 1.1       |                |
| <i>Rectum</i>               | 12            | 2.2         | 0.7       |                |
| Tumor differentiation grade |               |             |           | 0.729          |
| <i>Well/moderate</i>        | 48            | 2.3         | 1.0       |                |
| <i>Poor</i>                 | 13            | 2.4         | 1.0       |                |
| Tumor lymph node invasion   |               |             |           | 0.355          |
| <i>Yes</i>                  | 26            | 2.4         | 1.2       |                |
| <i>No</i>                   | 37            | 2.2         | 0.9       |                |

D. Krijgsman *et al.* : CD163 as a biomarker in colorectal cancer: the expression on circulating monocytes and tumor-associated macrophages, and the soluble form in the blood

| B.<br>Parameters            | Total monocytes<br>(% of CD45 <sup>+</sup> PBMCs) |      |    |              | Classical monocytes<br>(% of total monocytes) |    |              | Intermediate monocytes<br>(% of total monocytes) |    |         | Nonclassical monocytes<br>(% of total monocytes) |    |         |
|-----------------------------|---------------------------------------------------|------|----|--------------|-----------------------------------------------|----|--------------|--------------------------------------------------|----|---------|--------------------------------------------------|----|---------|
|                             | No.                                               | Mean | SD | P-value      | Mean                                          | SD | P-value      | Mean                                             | SD | P-value | Mean                                             | SD | P-value |
| TNM stage (Spearman)        |                                                   |      |    | <b>0.004</b> |                                               |    | 0.219        |                                                  |    | 0.179   |                                                  |    | 0.682   |
| TNM stage (ANOVA)           |                                                   |      |    | 0.060        |                                               |    | 0.215        |                                                  |    | 0.165   |                                                  |    | 0.641   |
| <i>Stage 0/I</i>            | 14                                                | 23   | 13 |              | 89                                            | 6  |              | 3                                                | 7  |         | 4                                                | 2  |         |
| <i>Stage II/III</i>         | 25                                                | 28   | 12 |              | 88                                            | 6  |              | 5                                                | 6  |         | 4                                                | 2  |         |
| <i>Stage IV</i>             | 8                                                 | 34   | 11 |              | 91                                            | 6  |              | 3                                                | 2  |         | 4                                                | 4  |         |
| Tumor location              |                                                   |      |    | 0.874        |                                               |    | 0.874        |                                                  |    | 0.961   |                                                  |    | 0.826   |
| <i>Colon</i>                | 35                                                | 28   | 14 |              | 89                                            | 7  |              | 4                                                | 6  |         | 4                                                | 3  |         |
| <i>Rectum</i>               | 12                                                | 26   | 8  |              | 89                                            | 4  |              | 4                                                | 4  |         | 4                                                | 2  |         |
| Tumor differentiation grade |                                                   |      |    | 0.055        |                                               |    | <b>0.039</b> |                                                  |    | 0.948   |                                                  |    | 0.886   |
| <i>Well/moderate</i>        | 34                                                | 25   | 12 |              | 88                                            | 7  |              | 5                                                | 7  |         | 4                                                | 3  |         |
| <i>Poor</i>                 | 11                                                | 34   | 15 |              | 92                                            | 3  |              | 2                                                | 1  |         | 4                                                | 2  |         |
| Tumor lymph node invasion   |                                                   |      |    | <b>0.011</b> |                                               |    | 0.254        |                                                  |    | 0.465   |                                                  |    | 0.877   |
| <i>Yes</i>                  | 17                                                | 40   | 13 |              | 89                                            | 8  |              | 5                                                | 7  |         | 4                                                | 3  |         |
| <i>No</i>                   | 30                                                | 24   | 11 |              | 89                                            | 5  |              | 4                                                | 5  |         | 4                                                | 2  |         |

D. Krijgsman *et al.* : CD163 as a biomarker in colorectal cancer: the expression on circulating monocytes and tumor-associated macrophages, and the soluble form in the blood

| C.                          | CD163 (MFI)     |       |      | CD163 (MFI)         |       |      | CD163 (MFI)            |       |       | CD163 (MFI)            |      |      |         |
|-----------------------------|-----------------|-------|------|---------------------|-------|------|------------------------|-------|-------|------------------------|------|------|---------|
|                             | Total monocytes |       |      | Classical monocytes |       |      | Intermediate monocytes |       |       | Nonclassical monocytes |      |      |         |
| Parameters                  | No.             | Mean  | SD   | P-value             | Mean  | SD   | P-value                | Mean  | SD    | P-value                | Mean | SD   | P-value |
| TNM stage (Spearman)        |                 |       |      | 0.968               |       |      | 0.894                  |       |       | 0.813                  |      |      | 0.161   |
| TNM stage (ANOVA)           |                 |       |      | 0.837               |       |      | 0.896                  |       |       | 0.485                  |      |      | 0.286   |
| <i>Stage 0/I</i>            | 14              | 10805 | 7656 |                     | 11376 | 8560 |                        | 17282 | 10209 |                        | 4014 | 1949 |         |
| <i>Stage II/III</i>         | 25              | 1188  | 5021 |                     | 12343 | 5491 |                        | 17525 | 7839  |                        | 3733 | 1976 |         |
| <i>Stage IV</i>             | 8               | 10912 | 4857 |                     | 11571 | 5858 |                        | 14009 | 3353  |                        | 2817 | 1140 |         |
| Tumor location              |                 |       |      | 0.762               |       |      | 0.806                  |       |       | 0.542                  |      |      | 0.188   |
| <i>Colon</i>                | 35              | 11239 | 6000 |                     | 11785 | 6772 |                        | 16010 | 9411  |                        | 3436 | 1778 |         |
| <i>Rectum</i>               | 12              | 11836 | 5370 |                     | 12327 | 5754 |                        | 19316 | 9639  |                        | 4318 | 2030 |         |
| Tumor differentiation grade |                 |       |      | 0.704               |       |      | 0.700                  |       |       | 0.969                  |      |      | 0.277   |
| <i>Well/moderate</i>        | 34              | 11366 | 6131 |                     | 11915 | 6886 |                        | 16375 | 8161  |                        | 3760 | 1990 |         |
| <i>Poor</i>                 | 11              | 10614 | 3749 |                     | 11060 | 4192 |                        | 17005 | 7109  |                        | 3121 | 1449 |         |
| Tumor lymph node invasion   |                 |       |      | 0.942               |       |      | 0.900                  |       |       | 0.947                  |      |      | 0.528   |
| <i>Yes</i>                  | 17              | 11308 | 4373 |                     | 11763 | 5191 |                        | 16151 | 4160  |                        | 3372 | 1419 |         |
| <i>No</i>                   | 30              | 11439 | 6534 |                     | 12014 | 7178 |                        | 17252 | 9644  |                        | 3825 | 2079 |         |

D. Krijgsman *et al.* : CD163 as a biomarker in colorectal cancer: the expression on circulating monocytes and tumor-associated macrophages, and the soluble form in the blood

| D.<br>Parameters            | M0 sTAM density<br>(cells/mm <sup>2</sup> ) |      |     | M1 sTAM density<br>(cells/mm <sup>2</sup> ) |      |     | M2 sTAM density<br>(cells/mm <sup>2</sup> ) |      |     | M3 sTAM density<br>(cells/mm <sup>2</sup> ) |      |     |         |
|-----------------------------|---------------------------------------------|------|-----|---------------------------------------------|------|-----|---------------------------------------------|------|-----|---------------------------------------------|------|-----|---------|
|                             | No.                                         | Mean | SD  | P-value                                     | Mean | SD  | P-value                                     | Mean | SD  | P-value                                     | Mean | SD  | P-value |
| TNM stage (Spearman)        |                                             |      |     | 0.563                                       |      |     | 0.998                                       |      |     | 0.423                                       |      |     | 0.947   |
| TNM stage (ANOVA)           |                                             |      |     | 0.876                                       |      |     | 0.621                                       |      |     | 0.239                                       |      |     | 0.835   |
| <i>Stage 0/I</i>            | 14                                          | 407  | 520 |                                             | 93   | 97  |                                             | 1153 | 675 |                                             | 220  | 294 |         |
| <i>Stage II/III</i>         | 49                                          | 387  | 329 |                                             | 125  | 133 |                                             | 1092 | 621 |                                             | 174  | 225 |         |
| <i>Stage IV</i>             | 9                                           | 335  | 161 |                                             | 64   | 44  |                                             | 1418 | 618 |                                             | 143  | 131 |         |
| Tumor location              |                                             |      |     | 0.809                                       |      |     | 0.245                                       |      |     | 0.650                                       |      |     | 0.179   |
| <i>Colon</i>                | 60                                          | 398  | 380 |                                             | 107  | 123 |                                             | 1166 | 655 |                                             | 154  | 190 |         |
| <i>Rectum</i>               | 12                                          | 316  | 179 |                                             | 134  | 111 |                                             | 1036 | 503 |                                             | 305  | 353 |         |
| Tumor differentiation grade |                                             |      |     | 1.000                                       |      |     | 0.800                                       |      |     | 0.112                                       |      |     | 0.894   |
| <i>Well/moderate</i>        | 58                                          | 400  | 384 |                                             | 117  | 127 |                                             | 1087 | 609 |                                             | 189  | 243 |         |
| <i>Poor</i>                 | 13                                          | 336  | 187 |                                             | 94   | 83  |                                             | 1414 | 707 |                                             | 146  | 163 |         |
| Tumor lymph node invasion   |                                             |      |     | 0.553                                       |      |     | 1.000                                       |      |     | 0.802                                       |      |     | 0.508   |
| <i>Yes</i>                  | 30                                          | 391  | 322 |                                             | 107  | 104 |                                             | 1178 | 677 |                                             | 150  | 174 |         |
| <i>No</i>                   | 42                                          | 379  | 381 |                                             | 114  | 132 |                                             | 1121 | 604 |                                             | 200  | 262 |         |

D. Krijgsman *et al.* : CD163 as a biomarker in colorectal cancer: the expression on circulating monocytes and tumor-associated macrophages, and the soluble form in the blood

| E.<br>Parameters            | M0 sTAMs<br>(% of total sTAMs) |      |    |         | M1 sTAMs<br>(% of total sTAMs) |    |         | M2 sTAMs<br>(% of total sTAMs) |    |         | M3 sTAMs<br>(% of total sTAMs) |    |         |
|-----------------------------|--------------------------------|------|----|---------|--------------------------------|----|---------|--------------------------------|----|---------|--------------------------------|----|---------|
|                             | No.                            | Mean | SD | P-value | Mean                           | SD | P-value | Mean                           | SD | P-value | Mean                           | SD | P-value |
| TNM stage (Spearman)        |                                |      |    | 0.952   |                                |    | 0.970   |                                |    | 0.419   |                                |    | 0.731   |
| TNM stage (ANOVA)           |                                |      |    | 0.814   |                                |    | 0.598   |                                |    | 0.287   |                                |    | 0.940   |
| <i>Stage 0/I</i>            | 14                             | 23   | 16 |         | 5                              | 5  |         | 62                             | 15 |         | 10                             | 10 |         |
| <i>Stage II/III</i>         | 49                             | 22   | 15 |         | 8                              | 9  |         | 61                             | 19 |         | 9                              | 9  |         |
| <i>Stage IV</i>             | 9                              | 17   | 5  |         | 4                              | 3  |         | 71                             | 8  |         | 8                              | 5  |         |
| Tumor location              |                                |      |    | 0.629   |                                |    | 0.174   |                                |    | 0.311   |                                |    | 0.139   |
| <i>Colon</i>                | 60                             | 22   | 14 |         | 7                              | 8  |         | 63                             | 18 |         | 8                              | 8  |         |
| <i>Rectum</i>               | 12                             | 19   | 12 |         | 8                              | 7  |         | 59                             | 14 |         | 14                             | 12 |         |
| Tumor differentiation grade |                                |      |    | 0.405   |                                |    | 0.582   |                                |    | 0.093   |                                |    | 0.582   |
| <i>Well/moderate</i>        | 58                             | 23   | 15 |         | 7                              | 8  |         | 61                             | 18 |         | 10                             | 10 |         |
| <i>Poor</i>                 | 13                             | 18   | 7  |         | 5                              | 5  |         | 70                             | 11 |         | 7                              | 6  |         |
| Tumor lymph node invasion   |                                |      |    | 0.615   |                                |    | 0.973   |                                |    | 0.900   |                                |    | 0.398   |
| <i>Yes</i>                  | 30                             | 21   | 12 |         | 7                              | 7  |         | 63                             | 17 |         | 9                              | 9  |         |
| <i>No</i>                   | 42                             | 21   | 15 |         | 7                              | 8  |         | 62                             | 18 |         | 10                             | 9  |         |

D. Krijgsman *et al.* : CD163 as a biomarker in colorectal cancer: the expression on circulating monocytes and tumor-associated macrophages, and the soluble form in the blood

| F.<br>Parameters            | M0 ieTAM density<br>(cells/mm <sup>2</sup> ) |      |     | M1 ieTAM density<br>(cells/mm <sup>2</sup> ) |      |     | M2 ieTAM density<br>(cells/mm <sup>2</sup> ) |      |    | M3 ieTAM density<br>(cells/mm <sup>2</sup> ) |      |     |         |
|-----------------------------|----------------------------------------------|------|-----|----------------------------------------------|------|-----|----------------------------------------------|------|----|----------------------------------------------|------|-----|---------|
|                             | No.                                          | Mean | SD  | P-value                                      | Mean | SD  | P-value                                      | Mean | SD | P-value                                      | Mean | SD  | P-value |
| TNM stage (Spearman)        |                                              |      |     | 0.743                                        |      |     | 0.293                                        |      |    | 0.901                                        |      |     | 0.092   |
| TNM stage (ANOVA)           |                                              |      |     | 0.763                                        |      |     | 0.164                                        |      |    | 0.816                                        |      |     | 0.329   |
| <i>Stage 0/I</i>            | 14                                           | 128  | 71  |                                              | 197  | 177 |                                              | 56   | 35 |                                              | 91   | 109 |         |
| <i>Stage II/III</i>         | 46                                           | 155  | 114 |                                              | 192  | 195 |                                              | 60   | 56 |                                              | 50   | 59  |         |
| <i>Stage IV</i>             | 8                                            | 132  | 80  |                                              | 73   | 41  |                                              | 61   | 34 |                                              | 26   | 23  |         |
| Tumor location              |                                              |      |     | 0.972                                        |      |     | 0.387                                        |      |    | 0.603                                        |      |     | 0.153   |
| <i>Colon</i>                | 58                                           | 148  | 106 |                                              | 183  | 177 |                                              | 62   | 52 |                                              | 59   | 74  |         |
| <i>Rectum</i>               | 10                                           | 137  | 80  |                                              | 156  | 221 |                                              | 47   | 34 |                                              | 34   | 49  |         |
| Tumor differentiation grade |                                              |      |     | 0.132                                        |      |     | 0.883                                        |      |    | <b>0.003</b>                                 |      |     | 0.689   |
| <i>Well/moderate</i>        | 55                                           | 137  | 90  |                                              | 186  | 193 |                                              | 49   | 40 |                                              | 54   | 71  |         |
| <i>Poor</i>                 | 12                                           | 197  | 141 |                                              | 160  | 134 |                                              | 105  | 68 |                                              | 64   | 76  |         |
| Tumor lymph node invasion   |                                              |      |     | 0.740                                        |      |     | 0.684                                        |      |    | 0.586                                        |      |     | 0.176   |
| <i>Yes</i>                  | 27                                           | 146  | 84  |                                              | 178  | 203 |                                              | 53   | 39 |                                              | 41   | 50  |         |
| <i>No</i>                   | 41                                           | 147  | 114 |                                              | 180  | 170 |                                              | 64   | 56 |                                              | 65   | 81  |         |

D. Krijgsman *et al.* : CD163 as a biomarker in colorectal cancer: the expression on circulating monocytes and tumor-associated macrophages, and the soluble form in the blood

| G.<br>Parameters            | M0 ieTAMs<br>(% of total ieTAMs) |      |    |         | M1 ieTAMs<br>(% of total ieTAMs) |    |         | M2 ieTAMs<br>(% of total ieTAMs) |    |              | M3 ieTAMs<br>(% of total ieTAMs) |    |         |
|-----------------------------|----------------------------------|------|----|---------|----------------------------------|----|---------|----------------------------------|----|--------------|----------------------------------|----|---------|
|                             | No.                              | Mean | SD | P-value | Mean                             | SD | P-value | Mean                             | SD | P-value      | Mean                             | SD | P-value |
| TNM stage (Spearman)        |                                  |      |    | 0.076   |                                  |    | 0.430   |                                  |    | 0.205        |                                  |    | 0.137   |
| TNM stage (ANOVA)           |                                  |      |    | 0.207   |                                  |    | 0.252   |                                  |    | 0.067        |                                  |    | 0.441   |
| <i>Stage 0/I</i>            | 14                               | 34   | 23 |         | 37                               | 18 |         | 13                               | 9  |              | 17                               | 18 |         |
| <i>Stage II/III</i>         | 46                               | 37   | 21 |         | 38                               | 20 |         | 14                               | 11 |              | 11                               | 10 |         |
| <i>Stage IV</i>             | 8                                | 45   | 12 |         | 26                               | 9  |         | 21                               | 6  |              | 9                                | 9  |         |
| Tumor location              |                                  |      |    | 0.315   |                                  |    | 0.860   |                                  |    | 0.768        |                                  |    | 0.153   |
| <i>Colon</i>                | 58                               | 36   | 20 |         | 36                               | 19 |         | 15                               | 11 |              | 13                               | 12 |         |
| <i>Rectum</i>               | 10                               | 43   | 19 |         | 35                               | 18 |         | 14                               | 8  |              | 7                                | 9  |         |
| Tumor differentiation grade |                                  |      |    | 0.327   |                                  |    | 0.095   |                                  |    | <b>0.004</b> |                                  |    | 0.630   |
| <i>Well/moderate</i>        | 55                               | 36   | 21 |         | 38                               | 20 |         | 13                               | 10 |              | 12                               | 12 |         |
| <i>Poor</i>                 | 12                               | 42   | 19 |         | 28                               | 15 |         | 20                               | 7  |              | 10                               | 11 |         |
| Tumor lymph node invasion   |                                  |      |    | 0.151   |                                  |    | 0.739   |                                  |    | 0.826        |                                  |    | 0.205   |
| <i>Yes</i>                  | 27                               | 41   | 20 |         | 35                               | 20 |         | 14                               | 8  |              | 10                               | 11 |         |
| <i>No</i>                   | 41                               | 35   | 21 |         | 37                               | 19 |         | 15                               | 12 |              | 13                               | 13 |         |

**Table S2:** Flow cytometry antibody panel used for the identification of monocytes in peripheral blood of CRC patients. Abbreviations: AF (alexa fluor), APC (allophycocyanin), BV (brilliant violet), FITC (fluorescein isothiocyanate), nIR (near-infrared), PE (phycoerythrin), PE-Cy7 (phycoerythrin-cyanine7), PerCP (peridinin chlorophyll protein complex), V500 (violet500).

| Flow cytometry antibody panel |                 |             |                   |                                             |
|-------------------------------|-----------------|-------------|-------------------|---------------------------------------------|
| Marker                        | Fluorochrome    | Clone       | Source            | Staining concentration ( $\mu\text{g/ml}$ ) |
| CD3                           | BV605           | SK7         | BD Biosciences    | 1.25                                        |
| CD4                           | PE-Cy7          | SK3         | BD Biosciences    | 0.03                                        |
| CD8                           | AF700           | RPA-T8      | BD Biosciences    | 0.32                                        |
| CD14                          | V500            | M $\phi$ p9 | BD Biosciences    | 0.25                                        |
| CD16                          | PerCP-eFluor710 | 3G8         | eBioscience       | 0.75                                        |
| CD25                          | APC             | BC96        | eBioscience       | 0.75                                        |
| CD45                          | FITC            | HI30        | BD Biosciences    | 0.3                                         |
| CD127                         | BV421           | HIL-7R-M21  | BD Biosciences    | 1.5                                         |
| CD163                         | PE              | Mac2-158    | Trillium          | 0.5                                         |
| Live/dead                     | nIR             | -           | Life Technologies | recommended                                 |



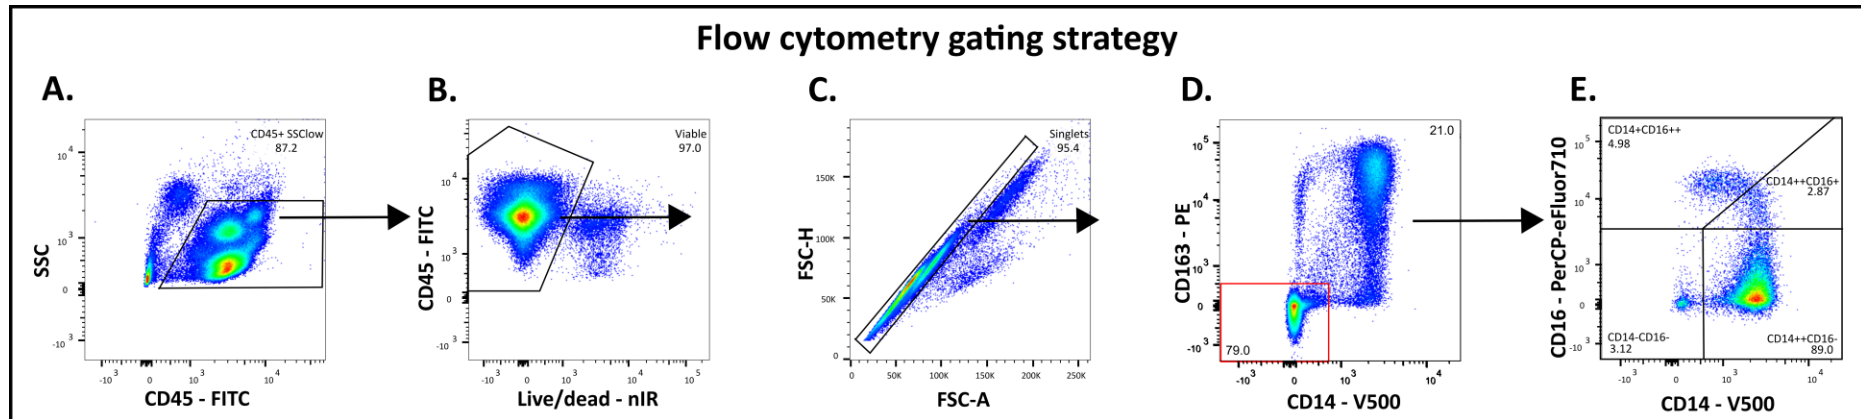

**Figure S1:** Flow cytometry gating strategy used for the identification of circulating monocyte subsets. **A.** Mononuclear cells (excluding CD45<sup>-</sup> cells and SSC<sup>high</sup> cells). **B.** Viable mononuclear cells (excluding dead cells). **C.** Single mononuclear cells (excluding doublets). **D.** CD14<sup>+</sup> and/or CD163<sup>+</sup> monocytes (excluding CD14<sup>-</sup>CD163<sup>-</sup> lymphocytes present in the red gate). **E.** Classical (CD14<sup>++</sup>CD16<sup>-</sup>), intermediate (CD14<sup>++</sup>CD16<sup>+</sup>) and nonclassical (CD14<sup>+</sup>CD16<sup>++</sup>) monocytes. Abbreviations: FSC (forward scatter), nIR (near-infrared), PBMC (peripheral blood mononuclear cells), SSC (side scatter).

D. Krijgsman *et al.* : CD163 as a biomarker in colorectal cancer: the expression on circulating monocytes and tumor-associated macrophages, and the soluble form in the blood

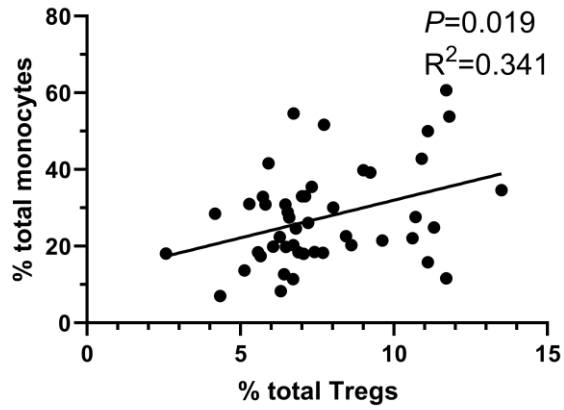

**Figure S2:** Association between circulating monocytes and Tregs in CRC patients. Correlation between the percentage of total circulating CD14<sup>+</sup> and/or CD163<sup>+</sup> monocytes and CD127<sup>low</sup>CD25<sup>+</sup> Tregs in CRC patients (N=47). Abbreviations: CRC (colorectal cancer), Tregs (regulatory T cells).

D. Krijgsman *et al.* : CD163 as a biomarker in colorectal cancer: the expression on circulating monocytes and tumor-associated macrophages, and the soluble form in the blood

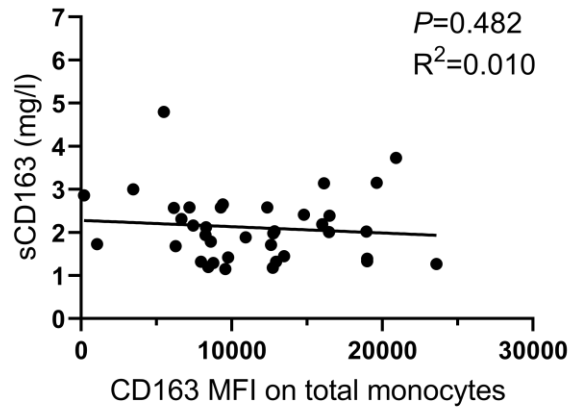

**Figure S3:** Association between sCD163 levels and CD163 expression by monocytes in CRC patients. Correlation between sCD163 levels and CD163 expression on circulating monocytes in CRC patients (N=38). Abbreviations: CRC (colorectal cancer), MFI (median fluorescence intensity).

D. Krijgsman *et al.* : CD163 as a biomarker in colorectal cancer: the expression on circulating monocytes and tumor-associated macrophages, and the soluble form in the blood

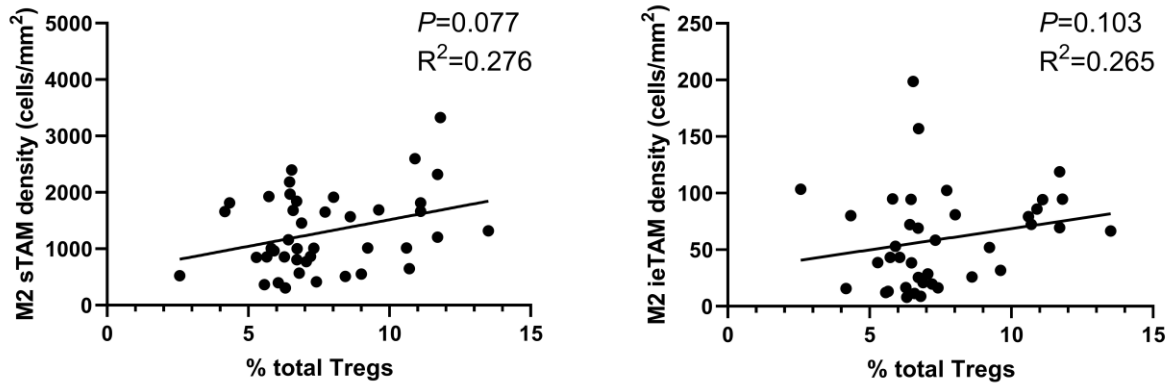

**Figure S4:** Association between circulating Tregs and M2 TAMs in CRC patients. Correlation between total circulating  $CD127^{low}CD25^{+}$  Tregs and  $CD68^{+}iNOS^{-}CD163^{+}$  M2 sTAM density (N=42) and ieTAM density (N=39) in CRC patients. Abbreviations: CRC (colorectal cancer), ieTAM (intraepithelial TAM), iNOS (inducible nitric oxide synthase), sTAM (stromal TAM), TAM (tumor-associated macrophage), Tregs (regulatory T cells).

D. Krijgsman *et al.* : CD163 as a biomarker in colorectal cancer: the expression on circulating monocytes and tumor-associated macrophages, and the soluble form in the blood

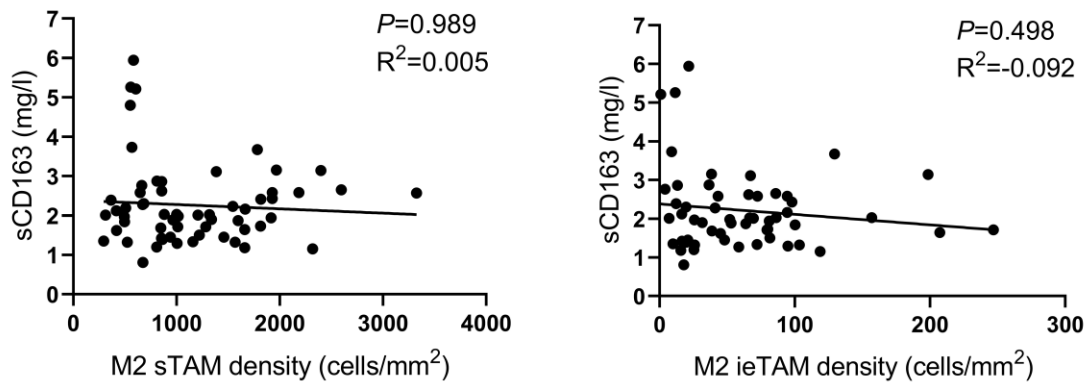

**Figure S5:** Association between sCD163 levels and CD163 expression by TAMs in CRC patients. Correlation between sCD163 levels and CD68<sup>+</sup>iNOS<sup>-</sup>CD163<sup>+</sup> M2 sTAM density (N=60) and ieTAM density (N=56) in CRC patients. Abbreviations: CRC (colorectal cancer), iNOS (inducible nitric oxide synthase), ieTAM (intraepithelial TAM), sTAM (stromal TAM), TAM (tumor-associated macrophage).
